# Supplementary material for: Effects of heavy metal ions on N-nitrosodimethylamine (NDMA) formation
Source: Royal Society of Chemistry journal article supplement (doi:10.1039/c6ra11481d), 2016-01-01
Supplement: c6ra11481d1.pdf [file c6ra11481d1.pdf]

# Effects of Heavy Metal Ions on *N*-Nitrosodimethylamine (NDMA) Formation

Yameng Liu,<sup>ac</sup> Yongdong Liu,<sup>\*a</sup> Rugang Zhong,<sup>a</sup> Bin Peng,<sup>\*bc</sup>

Henry F. Schaefer, III<sup>\*c</sup>

<sup>a</sup> Beijing Key Laboratory of Environmental and Viral Oncology, College of Life Science &

Bioengineering, Beijing University of Technology, Beijing 100124, P. R. China

<sup>b</sup> Center for Computational Quantum Chemistry, MOE Key Laboratory of Theoretical

Chemistry of the Environment, South China Normal University, Guangzhou, Guangdong

510631, P. R. China

<sup>c</sup> Center for Computational Quantum Chemistry, University of Georgia,

Athens, Georgia 30602, United States

---

<sup>a</sup>Corresponding author. E-mail: ccq@uga.edu.

<sup>b</sup>Corresponding author. E-mail: ydliu@bjut.edu.cn.

<sup>c</sup>Corresponding author. E-mail: pengbin@scnu.edu.cn.

- S1.** Natural atomic charges of Entrance complex, TS1, Intermediate and TS2 on Pathway 1
- S2.** Natural atomic charges of Entrance complex, TS3, Intermediate and TS4 on Pathway 2
- S3.** Natural atomic charges of Entrance complex, TS5 on Pathway 3



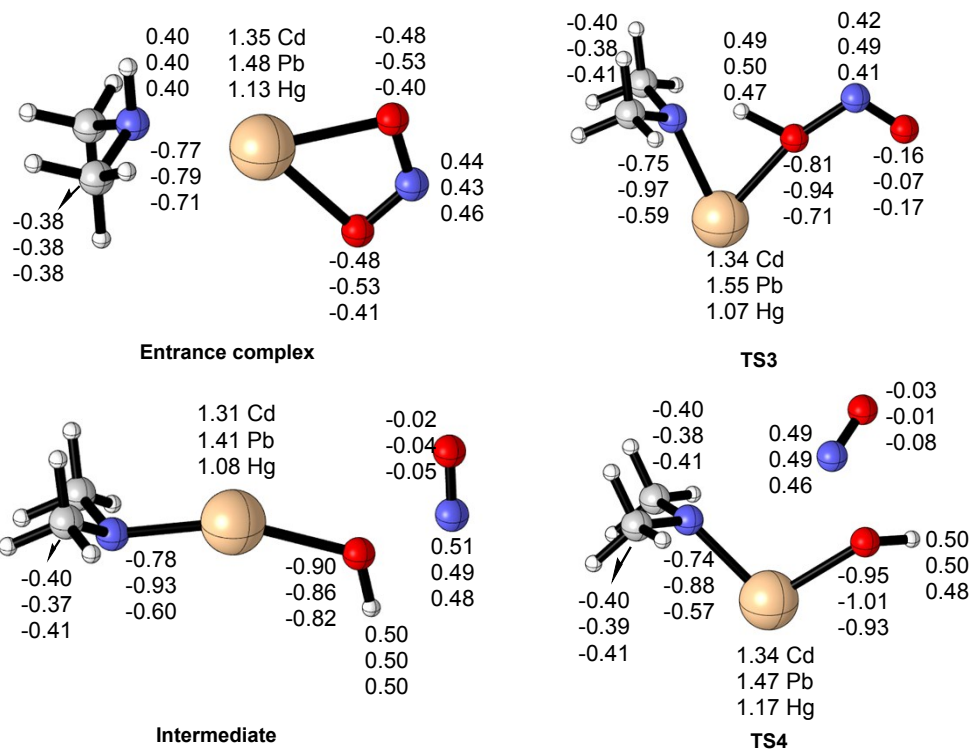

**S2.** Natural atomic charges of Entrance complex, TS3, Intermediate and TS4 on Pathway 2

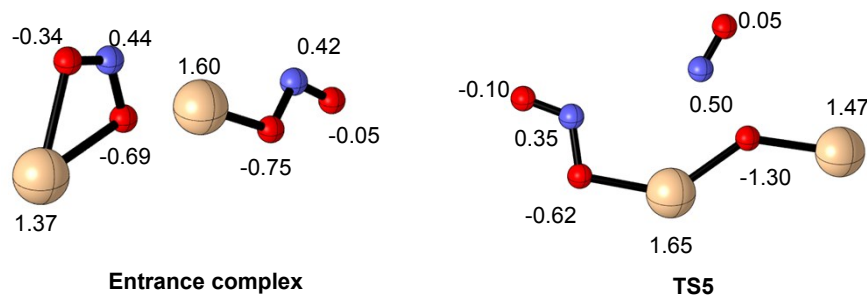

**S3.** Natural atomic charges of Entrance complex, TS5 on Pathway 3

Coordinates of Entrance complex in Pathway 1

|    |         |         |         |
|----|---------|---------|---------|
| N  | 0.4822  | 2.7114  | 0.0000  |
| O  | -0.5425 | 0.1906  | 1.0665  |
| O  | -0.5425 | 0.1906  | -1.0665 |
| H  | 1.4446  | 2.3844  | 0.0000  |
| N  | -0.6547 | 0.7808  | 0.0000  |
| C  | 0.1096  | 3.3610  | 1.2493  |
| H  | 0.3163  | 2.6924  | 2.0866  |
| H  | 0.6703  | 4.2928  | 1.3974  |
| H  | -0.9555 | 3.5948  | 1.2307  |
| C  | 0.1096  | 3.3610  | -1.2493 |
| H  | 0.6703  | 4.2928  | -1.3974 |
| H  | 0.3163  | 2.6924  | -2.0866 |
| H  | -0.9555 | 3.5948  | -1.2307 |
| Cd | 0.1844  | -1.8776 | 0.0000  |
|    |         |         |         |
| N  | -0.4581 | 3.4776  | 0.0000  |
| O  | 0.3904  | 1.1448  | -1.0858 |
| O  | 0.3904  | 1.1448  | 1.0858  |
| H  | -1.4469 | 3.2291  | 0.0000  |
| N  | 0.3341  | 1.6131  | 0.0000  |
| C  | -0.0503 | 4.1071  | -1.2576 |
| H  | -0.6016 | 5.0424  | -1.4029 |
| H  | 1.0176  | 4.3209  | -1.2261 |
| H  | -0.2706 | 3.4358  | -2.0884 |
| C  | -0.0503 | 4.1071  | 1.2576  |
| H  | -0.6016 | 5.0424  | 1.4029  |
| H  | -0.2706 | 3.4358  | 2.0884  |
| H  | 1.0176  | 4.3209  | 1.2261  |
| Hg | -0.0262 | -1.6537 | 0.0000  |

Coordinates of TS1 in Pathway 1

|    |         |         |         |
|----|---------|---------|---------|
| N  | 2.4656  | -0.3930 | 0.2972  |
| O  | 1.2680  | 1.6892  | -0.8201 |
| O  | -0.1801 | -0.3570 | -0.2566 |
| H  | 1.6627  | -0.8268 | 0.7506  |
| N  | 1.2602  | 0.5713  | -1.0076 |
| C  | 3.1743  | 0.5589  | 1.1386  |
| H  | 2.4883  | 1.3507  | 1.4531  |
| H  | 3.5853  | 0.0813  | 2.0344  |
| H  | 3.9941  | 1.0046  | 0.5729  |
| C  | 3.2604  | -1.3495 | -0.4720 |
| H  | 3.7949  | -2.0436 | 0.1851  |
| H  | 2.5978  | -1.9167 | -1.1262 |
| H  | 3.9896  | -0.8099 | -1.0786 |
| Cd | -2.0793 | 0.0554  | 0.1545  |

|    |         |         |         |
|----|---------|---------|---------|
| N  | 2.5180  | -0.3923 | 0.2754  |
| O  | 1.3193  | 1.7928  | -0.5353 |
| O  | -0.1188 | -0.4435 | -0.3801 |
| H  | 1.7178  | -0.9012 | 0.6521  |
| N  | 1.3573  | 0.7237  | -0.8955 |
| C  | 3.2049  | 0.4344  | 1.2584  |
| H  | 2.5081  | 1.1707  | 1.6686  |
| H  | 3.5973  | -0.1679 | 2.0840  |
| H  | 4.0345  | 0.9564  | 0.7793  |
| C  | 3.3348  | -1.2224 | -0.6129 |
| H  | 3.8683  | -1.9942 | -0.0494 |
| H  | 2.6855  | -1.7004 | -1.3466 |
| H  | 4.0636  | -0.5944 | -1.1276 |
| Hg | -2.1201 | -0.1939 | 0.0982  |

### Coordinates of the Intermediate in Pathway 1

|    |         |         |         |
|----|---------|---------|---------|
| N  | 2.7469  | -0.3723 | 0.2389  |
| O  | 1.6962  | 1.8896  | -0.4338 |
| O  | 0.2037  | -0.2834 | 0.1645  |
| H  | 1.9081  | -0.7990 | 0.6492  |
| N  | 1.6726  | 0.8488  | -0.8664 |
| C  | 3.5365  | 0.3979  | 1.1885  |
| H  | 2.9403  | 1.2389  | 1.5556  |
| H  | 3.8290  | -0.2128 | 2.0477  |
| H  | 4.4335  | 0.7800  | 0.6993  |
| C  | 3.4461  | -1.2728 | -0.6774 |
| H  | 3.9236  | -2.0923 | -0.1314 |
| H  | 2.7264  | -1.6871 | -1.3836 |
| H  | 4.2112  | -0.7181 | -1.2230 |
| Cd | -1.7334 | -0.4130 | -0.1787 |

|    |         |         |         |
|----|---------|---------|---------|
| N  | 2.9955  | -0.4732 | 0.2289  |
| O  | 2.0188  | 1.8469  | -0.4631 |
| O  | 0.4766  | -0.2262 | 0.2896  |
| H  | 2.2174  | -0.9139 | 0.7256  |
| N  | 1.9006  | 0.7995  | -0.8570 |
| C  | 3.8620  | 0.3082  | 1.1019  |
| H  | 4.3013  | -0.3178 | 1.8847  |
| H  | 4.6643  | 0.7581  | 0.5150  |
| H  | 3.2778  | 1.0977  | 1.5815  |
| C  | 3.6216  | -1.3763 | -0.7385 |
| H  | 4.1568  | -2.1836 | -0.2288 |
| H  | 2.8485  | -1.8071 | -1.3748 |
| H  | 4.3281  | -0.8178 | -1.3547 |
| Hg | -1.5619 | -0.0647 | 0.0202  |

Coordinates of the TS2 in Pathway 1

|    |         |         |         |
|----|---------|---------|---------|
| N  | 0.0031  | 0.0526  | -0.1190 |
| O  | 0.1701  | -0.0746 | 2.3383  |
| O  | 2.4204  | -0.0773 | 0.2499  |
| H  | 1.0606  | 0.1557  | -0.2925 |
| N  | 0.3157  | -0.7775 | 1.4660  |
| C  | -0.6855 | 1.3244  | 0.0675  |
| H  | -0.2783 | 1.8279  | 0.9477  |
| H  | -0.5234 | 1.9690  | -0.8000 |
| H  | -1.7559 | 1.1589  | 0.2014  |
| C  | -0.6091 | -0.9421 | -1.0045 |
| H  | -0.5999 | -0.5792 | -2.0353 |
| H  | -0.0324 | -1.8652 | -0.9462 |
| H  | -1.6403 | -1.1303 | -0.7001 |
| Cd | 4.3774  | -0.2024 | 0.1675  |
|    |         |         |         |
| N  | 2.2731  | -0.4556 | 0.0981  |
| O  | 2.2952  | 1.9951  | -0.1839 |
| O  | -0.1421 | 0.0459  | 0.1172  |
| H  | 1.2164  | -0.5646 | 0.2623  |
| N  | 2.0706  | 1.0976  | -0.8280 |
| C  | 3.0348  | -0.2510 | 1.3264  |
| H  | 2.7356  | 0.6960  | 1.7826  |
| H  | 2.8208  | -1.0532 | 2.0369  |
| H  | 4.1036  | -0.2336 | 1.1078  |
| C  | 2.7632  | -1.4497 | -0.8640 |
| H  | 2.6793  | -2.4524 | -0.4378 |
| H  | 2.1549  | -1.3930 | -1.7670 |
| H  | 3.8076  | -1.2498 | -1.1089 |
| Hg | -2.1522 | -0.3270 | -0.0194 |



### Coordinates of Exit complex in Pathway 1

|    |         |         |         |
|----|---------|---------|---------|
| N  | -0.3557 | 0.3517  | -0.0347 |
| O  | 0.7123  | 1.6015  | 1.3824  |
| O  | 2.5781  | -0.8039 | 0.3801  |
| H  | 2.8972  | 0.1098  | 0.4295  |
| N  | 0.7407  | 0.7366  | 0.5409  |
| C  | -1.6292 | 0.9977  | 0.3233  |
| H  | -1.6111 | 2.0465  | 0.0196  |
| H  | -2.4286 | 0.4702  | -0.1908 |
| H  | -1.7689 | 0.9452  | 1.4042  |
| C  | -0.2718 | -0.6755 | -1.0710 |
| H  | -0.5964 | -0.2597 | -2.0269 |
| H  | 0.7631  | -1.0036 | -1.1306 |
| H  | -0.9161 | -1.5138 | -0.7999 |
| Cd | 4.1708  | -2.1159 | 0.6521  |
|    |         |         |         |
| N  | 3.4866  | -0.4889 | 0.1113  |
| O  | 3.1745  | 1.6735  | 0.2244  |
| O  | 0.9231  | 0.2823  | -0.3852 |
| H  | 0.8771  | 0.9354  | -1.1075 |
| N  | 2.8213  | 0.5919  | -0.1298 |
| C  | 4.7583  | -0.3802 | 0.8515  |
| H  | 4.6212  | 0.3063  | 1.6870  |
| H  | 5.0129  | -1.3758 | 1.2070  |
| H  | 5.5437  | -0.0003 | 0.1947  |
| C  | 3.0550  | -1.7642 | -0.4708 |
| H  | 2.9215  | -2.4904 | 0.3320  |
| H  | 2.1178  | -1.6088 | -0.9961 |
| H  | 3.8267  | -2.1148 | -1.1587 |
| Hg | -1.3633 | -0.0123 | -0.0094 |

Coordinates of Entrance complex in Pathway 2

|    |         |         |         |
|----|---------|---------|---------|
| N  | 0.7662  | 0.0015  | -0.1414 |
| O  | -1.6729 | -0.0027 | 3.5142  |
| N  | -0.9389 | -0.0002 | 4.5201  |
| C  | 0.3502  | -1.2405 | -0.8678 |
| H  | 0.7438  | -2.1203 | -0.3576 |
| H  | -0.7383 | -1.2960 | -0.9014 |
| H  | 0.7320  | -1.2238 | -1.8913 |
| C  | 0.3415  | 1.2388  | -0.8709 |
| H  | -0.7474 | 1.2866  | -0.9045 |
| H  | 0.7289  | 2.1226  | -0.3628 |
| H  | 0.7233  | 1.2223  | -1.8943 |
| O  | 0.2861  | 0.0032  | 4.2904  |
| Cd | 0.0587  | 0.0017  | 2.0265  |
| H  | 1.7858  | 0.0051  | -0.1124 |
|    |         |         |         |
| N  | 0.0000  | 0.0000  | 0.0000  |
| O  | 0.0000  | 0.0000  | 3.1408  |
| N  | 1.2574  | 0.0000  | 3.2086  |
| C  | 0.4006  | -0.5048 | -1.3456 |
| H  | 1.3532  | -1.0324 | -1.2767 |
| H  | -0.3656 | -1.1831 | -1.7245 |
| H  | 0.5096  | 0.3247  | -2.0481 |
| C  | -1.2387 | 0.8327  | -0.0531 |
| H  | -2.0780 | 0.2184  | -0.3844 |
| H  | -1.4492 | 1.2430  | 0.9352  |
| H  | -1.1136 | 1.6564  | -0.7597 |
| O  | 1.7792  | -0.8658 | 2.4590  |
| H  | 0.7557  | 0.5910  | 0.3467  |
| Pb | -0.2136 | -1.7578 | 1.6150  |
|    |         |         |         |
| N  | 2.2098  | -0.0255 | -0.2898 |
| O  | -2.1814 | 0.1224  | 1.2220  |
| N  | -2.9321 | 0.0243  | 0.2537  |
| C  | 2.8168  | 1.2654  | 0.1500  |
| H  | 2.3994  | 2.0900  | -0.4280 |
| H  | 2.6123  | 1.4223  | 1.2092  |
| H  | 3.8995  | 1.2383  | 0.0012  |
| C  | 2.8191  | -1.2018 | 0.3985  |
| H  | 2.6147  | -1.1447 | 1.4676  |
| H  | 2.4033  | -2.1258 | -0.0035 |
| H  | 3.9018  | -1.2029 | 0.2470  |
| O  | -2.4296 | -0.0877 | -0.8638 |
| H  | 2.3802  | -0.1261 | -1.2897 |
| Hg | -0.1512 | -0.0075 | -0.0892 |

Coordinates of TS3 in Pathway 2

|    |         |         |         |
|----|---------|---------|---------|
| Cd | 0.3214  | -1.0922 | 0.0000  |
| N  | 1.1104  | 1.0249  | 0.0000  |
| O  | -3.4702 | 0.5330  | 0.0000  |
| N  | -2.5507 | 1.2227  | 0.0000  |
| C  | 1.7867  | 1.4782  | 1.2208  |
| H  | 1.2332  | 1.1659  | 2.1082  |
| H  | 2.8182  | 1.1194  | 1.2896  |
| H  | 1.8205  | 2.5758  | 1.2099  |
| C  | 1.7867  | 1.4782  | -1.2208 |
| H  | 2.8182  | 1.1194  | -1.2896 |
| H  | 1.2332  | 1.1659  | -2.1082 |
| H  | 1.8205  | 2.5758  | -1.2099 |
| O  | -1.2795 | 0.4770  | 0.0000  |
| H  | -0.2759 | 1.0839  | 0.0000  |
| Pb | -0.2849 | -0.7739 | 0.0000  |
| N  | -1.0049 | 1.3200  | 0.0000  |
| O  | 3.6545  | 0.4905  | 0.0000  |
| N  | 2.8948  | 1.3151  | 0.0000  |
| C  | -1.6603 | 1.8259  | -1.2221 |
| H  | -1.1444 | 1.4648  | -2.1174 |
| H  | -2.7142 | 1.5324  | -1.2818 |
| H  | -1.6149 | 2.9199  | -1.2399 |
| C  | -1.6603 | 1.8259  | 1.2221  |
| H  | -2.7142 | 1.5324  | 1.2818  |
| H  | -1.1444 | 1.4648  | 2.1174  |
| H  | -1.6149 | 2.9199  | 1.2399  |
| O  | 1.3394  | 0.7204  | 0.0000  |
| H  | 0.4811  | 1.4279  | 0.0000  |
| Hg | -0.6064 | -0.7174 | 0.0000  |
| N  | -0.2607 | 1.6783  | 0.0000  |
| O  | 3.7281  | -0.4964 | 0.0000  |
| N  | 3.0402  | 0.4368  | 0.0000  |
| C  | -0.6919 | 2.3445  | -1.2243 |
| H  | -0.3388 | 1.8053  | -2.1034 |
| H  | -1.7766 | 2.4772  | -1.2728 |
| H  | -0.2403 | 3.3481  | -1.2348 |
| C  | -0.6919 | 2.3445  | 1.2243  |
| H  | -1.7766 | 2.4772  | 1.2728  |
| H  | -0.3388 | 1.8053  | 2.1034  |
| H  | -0.2403 | 3.3481  | 1.2348  |
| O  | 1.6641  | 0.1543  | 0.0000  |
| H  | 0.9329  | 1.1083  | 0.0000  |

Coordinates of the Intermediate in Pathway 2

|    |         |         |         |
|----|---------|---------|---------|
| N  | 2.2136  | -0.0006 | -0.2177 |
| O  | -3.6770 | 0.0090  | 1.0171  |
| N  | -3.6749 | -0.0031 | -0.0914 |
| C  | 2.8766  | 1.2158  | 0.2604  |
| H  | 2.3879  | 2.1095  | -0.1340 |
| H  | 2.9503  | 1.2990  | 1.3529  |
| H  | 3.9029  | 1.2034  | -0.1324 |
| C  | 2.8781  | -1.2053 | 0.2869  |
| H  | 2.9519  | -1.2644 | 1.3810  |
| H  | 2.3905  | -2.1081 | -0.0877 |
| H  | 3.9044  | -1.2003 | -0.1060 |
| O  | -2.0376 | -0.0088 | -0.7147 |
| Cd | 0.1070  | -0.0005 | -0.0861 |
| H  | -2.2093 | -0.0193 | -1.6703 |
|    |         |         |         |
| N  | 0.2410  | 0.4596  | -0.0563 |
| O  | -0.9064 | -0.6292 | 5.0589  |
| N  | 0.0247  | -1.0442 | 4.6110  |
| C  | 0.8502  | -0.8550 | -0.2310 |
| H  | 0.7788  | -1.4521 | 0.6802  |
| H  | 0.3381  | -1.4104 | -1.0257 |
| H  | 1.9069  | -0.7676 | -0.5125 |
| C  | 0.1994  | 1.2242  | -1.3077 |
| H  | -0.3759 | 0.6891  | -2.0716 |
| H  | -0.2688 | 2.2048  | -1.1635 |
| H  | 1.2097  | 1.3947  | -1.6970 |
| O  | 0.3205  | -0.3543 | 3.0664  |
| H  | 1.1342  | -0.8136 | 2.8035  |
| Pb | -0.5285 | 1.3540  | 1.6353  |
|    |         |         |         |
| N  | 2.3081  | 0.0003  | -0.1950 |
| O  | -3.6786 | 0.0292  | 1.1581  |
| N  | -3.7618 | -0.0007 | 0.0443  |
| C  | 2.8687  | 1.2261  | 0.3739  |
| H  | 2.4210  | 2.1089  | -0.0834 |
| H  | 2.8129  | 1.2993  | 1.4670  |
| H  | 3.9349  | 1.2185  | 0.1040  |
| C  | 2.8721  | -1.1925 | 0.4370  |
| H  | 2.8164  | -1.2088 | 1.5324  |
| H  | 2.4269  | -2.0992 | 0.0263  |
| H  | 3.9383  | -1.1960 | 0.1670  |
| O  | -2.2373 | -0.0179 | -0.6663 |
| H  | -2.4559 | -0.0434 | -1.6127 |
| Hg | 0.0896  | -0.0007 | -0.1170 |

Coordinates of TS4 in Pathway 2

|    |         |         |         |
|----|---------|---------|---------|
| N  | -0.1904 | -0.0002 | -0.2554 |
| O  | 1.1022  | -0.0230 | 3.4709  |
| N  | 1.4209  | 0.1640  | 2.4246  |
| C  | -1.6426 | -0.1432 | -0.3252 |
| H  | -2.1377 | 0.5073  | 0.3991  |
| H  | -2.0586 | 0.0558  | -1.3221 |
| H  | -1.8978 | -1.1833 | -0.0774 |
| C  | 0.4798  | -0.8869 | -1.2034 |
| H  | 0.1850  | -0.7201 | -2.2482 |
| H  | 1.5654  | -0.7993 | -1.1238 |
| H  | 0.2050  | -1.9225 | -0.9581 |
| O  | 1.4917  | 1.9351  | 1.9802  |
| H  | 1.4522  | 2.5281  | 2.7477  |
| Cd | 0.6061  | 1.9906  | -0.0253 |
| Pb | 0.0472  | -0.9233 | 1.0828  |
| N  | 1.1661  | 0.7109  | 0.3580  |
| O  | -2.5774 | 1.9598  | -0.1068 |
| N  | -1.5700 | 1.5881  | -0.3702 |
| C  | 2.1570  | 1.3291  | 1.2386  |
| H  | 2.1174  | 0.9024  | 2.2463  |
| H  | 3.1722  | 1.1899  | 0.8474  |
| H  | 1.9833  | 2.4081  | 1.3335  |
| C  | 1.2593  | 1.1791  | -1.0180 |
| H  | 2.2699  | 1.0043  | -1.4096 |
| H  | 0.5526  | 0.6564  | -1.6615 |
| H  | 1.0693  | 2.2593  | -1.0860 |
| O  | -1.4628 | -0.3403 | -0.4205 |
| H  | -2.2894 | -0.7849 | -0.6624 |
| Hg | -0.7601 | -0.3442 | 1.0744  |
| N  | 0.4779  | 1.4562  | 0.3255  |
| O  | 2.4007  | -0.1235 | -1.3208 |
| N  | 2.2197  | -0.0548 | -0.2207 |
| C  | -0.0374 | 2.1415  | -0.8492 |
| H  | -0.3364 | 1.4277  | -1.6194 |
| H  | -0.8812 | 2.8072  | -0.6283 |
| H  | 0.7638  | 2.7778  | -1.2540 |
| C  | 0.9254  | 2.3755  | 1.3643  |
| H  | 0.1295  | 3.0412  | 1.7202  |
| H  | 1.3504  | 1.8288  | 2.2068  |
| H  | 1.7072  | 3.0195  | 0.9373  |
| O  | 1.1663  | -1.4587 | 0.4422  |
| H  | 1.2598  | -2.2625 | -0.0948 |

Coordinates of Exit complex in Pathway 2

|    |         |         |         |
|----|---------|---------|---------|
| N  | -1.2661 | 0.3906  | 0.0589  |
| O  | -2.4620 | -1.6086 | -0.0796 |
| N  | -1.8620 | -0.8912 | -0.7501 |
| C  | -1.8168 | 0.4757  | 1.4286  |
| H  | -1.5883 | -0.4319 | 1.9884  |
| H  | -1.3771 | 1.3345  | 1.9387  |
| H  | -2.9025 | 0.6049  | 1.3936  |
| C  | -1.6095 | 1.5612  | -0.8004 |
| H  | -1.0749 | 2.4462  | -0.4528 |
| H  | -1.3309 | 1.3460  | -1.8334 |
| H  | -2.6832 | 1.7583  | -0.7550 |
| O  | 2.9183  | -0.2458 | 0.2491  |
| H  | 3.4541  | -0.5201 | -0.5050 |
| Cd | 0.9644  | -0.0115 | -0.0419 |
|    |         |         |         |
| N  | 0.3995  | -0.0537 | -0.0838 |
| O  | 0.7771  | -0.2318 | 2.1318  |
| N  | 1.3278  | -0.1254 | 1.1046  |
| C  | -1.0123 | -0.3475 | 0.2340  |
| H  | -1.3727 | 0.3680  | 0.9710  |
| H  | -1.5978 | -0.2654 | -0.6829 |
| H  | -1.1082 | -1.3627 | 0.6294  |
| C  | 0.9948  | -0.8828 | -1.1618 |
| H  | 0.5459  | -0.6195 | -2.1206 |
| H  | 2.0711  | -0.7064 | -1.1969 |
| H  | 0.8175  | -1.9432 | -0.9683 |
| O  | -0.3190 | 2.6741  | 0.9828  |
| H  | -0.6171 | 3.4465  | 1.4752  |
| Pb | 0.7893  | 2.3962  | -0.6331 |
|    |         |         |         |
| N  | 0.0867  | -0.2296 | 0.3356  |
| O  | -0.0431 | -1.2604 | 2.4372  |
| N  | 0.7469  | -0.8894 | 1.6920  |
| C  | -1.3652 | -0.4884 | 0.2571  |
| H  | -1.8695 | -0.0985 | 1.1418  |
| H  | -1.7700 | -0.0033 | -0.6326 |
| H  | -1.5518 | -1.5642 | 0.1875  |
| C  | 0.8698  | -0.8215 | -0.7832 |
| H  | 0.6481  | -0.2951 | -1.7123 |
| H  | 1.9349  | -0.7420 | -0.5609 |
| H  | 0.6068  | -1.8754 | -0.9039 |
| O  | 0.7840  | 4.0685  | 0.7932  |
| H  | 1.7147  | 4.3331  | 0.8356  |
| Hg | 0.6135  | 2.0151  | 0.5942  |

Coordinates of Entrance complex in Pathway 3

|    |         |         |         |
|----|---------|---------|---------|
| N  | 0.8156  | 1.8122  | -0.0818 |
| O  | 1.9882  | 2.0788  | -0.1029 |
| N  | -4.7070 | -0.0010 | 0.1826  |
| O  | -5.6561 | -0.6326 | 0.0549  |
| O  | -3.5082 | -0.7030 | -0.1327 |
| O  | 0.5496  | 0.5371  | 0.0116  |
| Cd | 2.9970  | -0.0221 | 0.0411  |
| Cd | -1.6929 | 0.2117  | 0.0186  |

Coordinates of TS5 in Pathway 3

|    |         |         |         |
|----|---------|---------|---------|
| N  | 0.3219  | 1.8194  | 0.1918  |
| O  | -0.2472 | 2.7541  | 0.2774  |
| N  | 3.2742  | 0.8608  | -0.1503 |
| O  | 4.3481  | 1.3051  | -0.2093 |
| O  | 3.1252  | -0.4777 | -0.2139 |
| O  | -0.6981 | 0.2343  | 0.1073  |
| Cd | -2.7764 | -0.1406 | 0.1484  |
| Cd | 1.0806  | -0.9322 | -0.0812 |

Coordinates of Exit complex in Pathway 3

|    |         |         |         |
|----|---------|---------|---------|
| N  | -4.8056 | 1.4705  | -0.0526 |
| O  | -5.7844 | 0.9902  | -0.0538 |
| N  | -3.5832 | -0.3832 | -0.0342 |
| O  | -4.4120 | -1.2200 | -0.0339 |
| O  | -2.3371 | -0.7200 | -0.0350 |
| O  | 1.6072  | 0.3781  | 0.2068  |
| Cd | 3.5412  | 0.0414  | -0.0265 |
| Cd | -0.3300 | -0.1123 | 0.0267  |
